# Supplementary material for: Abundance, Diversity and Role of ICEs and IMEs in the Adaptation of Streptococcus salivarius to the Environment
Source: MDPI journal article supplement (doi:10.3390/genes11090999), 2020-08-26

Biological functions of cargo genes

Signal transduction / regulatory system  
Bacteriocin synthesis and immunity  
Resistance to antibiotic

Resistance to heavy metal  
Resistance to antimicrobial agents  
Transporter

Restriction-Modification system  
Antiphage  
Metabolism

Redox and stress response  
Other

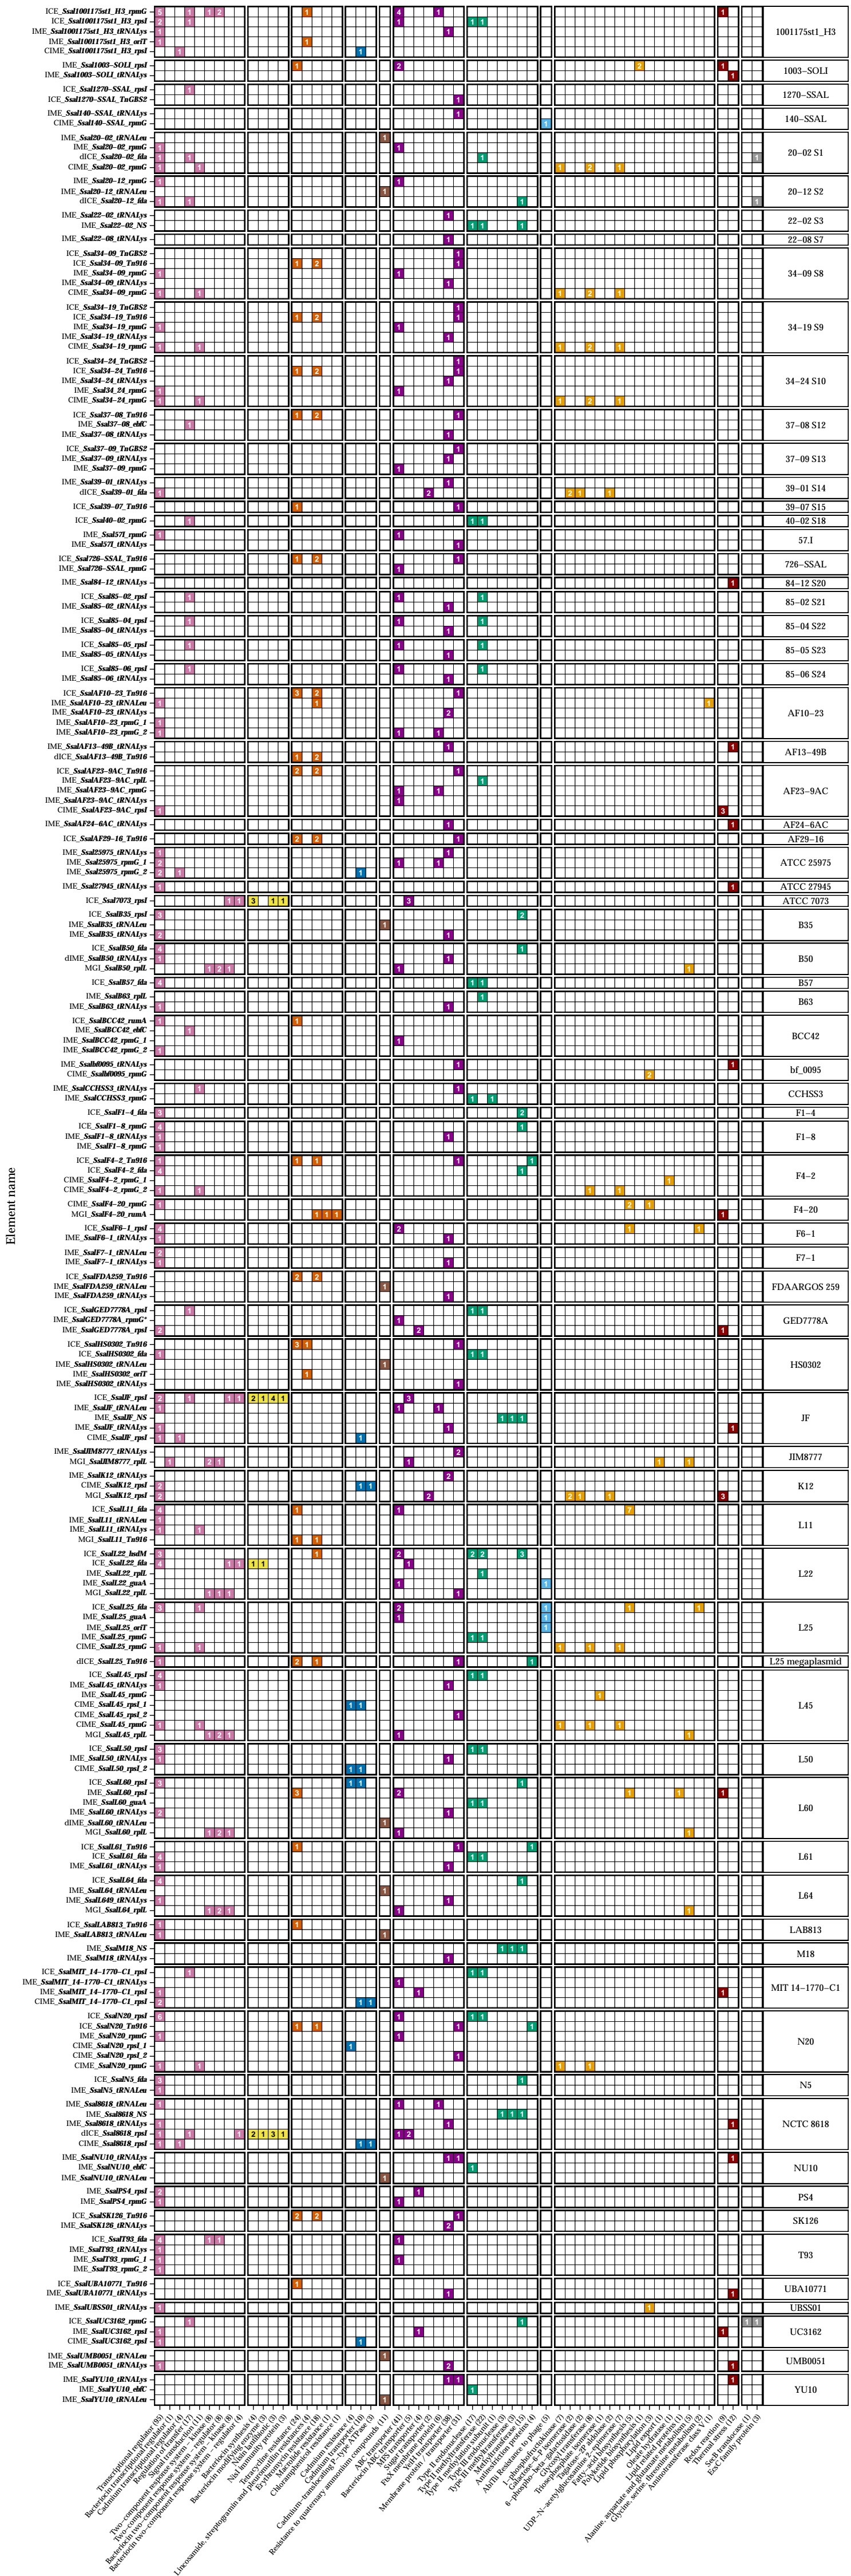

Supplement: s1 [file s1]
